# Supplementary material for: Solution-processed bulk-heterojunction organic solar cells employing Ir complexes as electron donors
Source: Royal Society of Chemistry journal article supplement (doi:10.1039/c4ta01526f), 2014-05-21
Supplement: c4ta01526f1.pdf [file c4ta01526f1.pdf]

Electronic Supplementary Information for:

## **Solution-processed bulk-heterojunction organic solar cells employing Ir complexes as electron donors**

Hongyu Zhen, <sup>\*ab</sup> Qiong Hou,<sup>cd</sup> Kan Li,<sup>a</sup> Zaifei Ma,<sup>b</sup> Simone Fabiano,<sup>d</sup> Feng Gao<sup>b</sup> and Fengling Zhang<sup>b</sup>

<sup>a</sup>State key laboratory of Modern Optical Instrumentation, Zhejiang University, Hangzhou 310027, China \*E-mail: hongyuzhen@zju.edu.cn

<sup>b</sup> Department of Physics, Chemistry, and Biology, Linköping University, SE-581 83, Linköping, Sweden

<sup>c</sup> School of Chemistry & Environment, South China Normal University, Guangzhou 510006, China

<sup>d</sup> State Key Laboratory of Luminescent Materials and Devices, South China University of Technology, 510641, China

<sup>e</sup> Department of Science and Technology, Organic Electronics, Linköping University, SE-601 74, Norrköping, Sweden

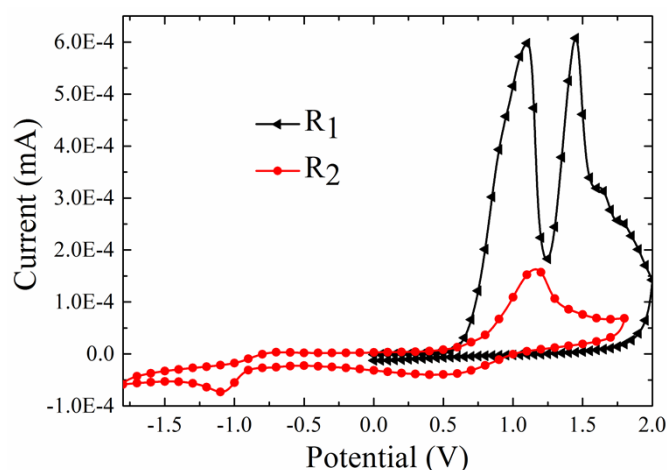

**Fig. S1.** Cyclic voltammograms of Ir complexes films on glass-carbon electrode in an acetonitrile solution of 0.1 mol L<sup>-1</sup> TBAP with a scan rate of 50 mV/s.

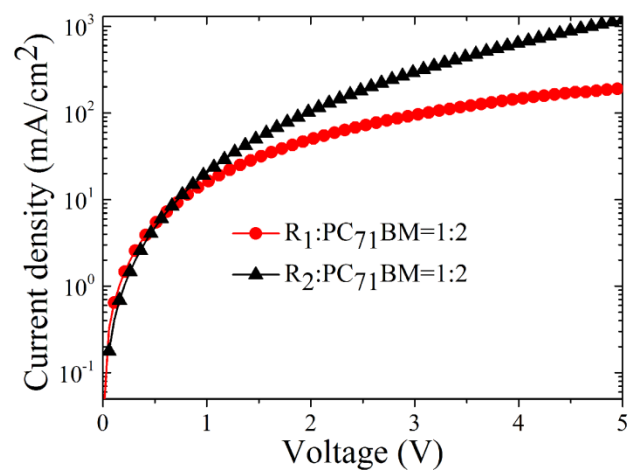

**Fig. S2.**  $J$ - $V$  characteristics of the hole-only devices based on based on  $R_1/R_2$ :PC<sub>71</sub>BM blends with a weight ratio of 1:2.

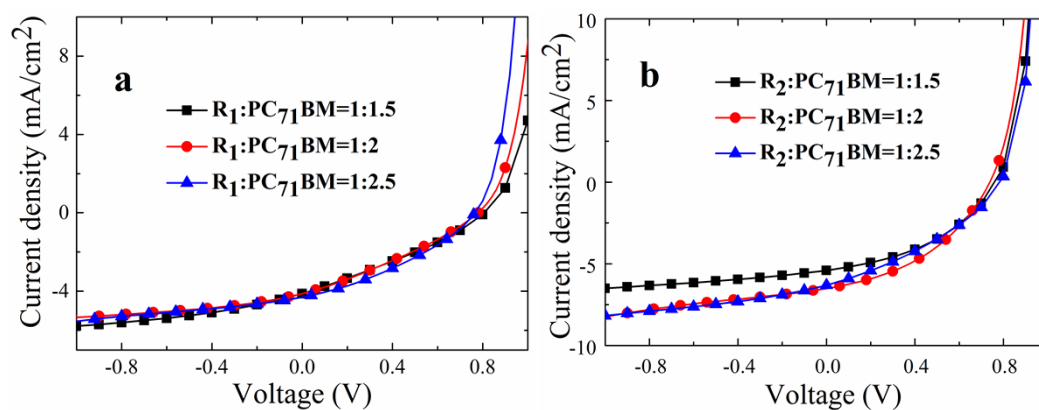

**Fig. S3.**  $J$ - $V$  characteristics of the OSCs based on  $R_1/R_2$ :PC<sub>71</sub>BM blends with different ratios
